# Supplementary material for: A novel fast-responsive fluorescent probe based on 1,3,5-triazine for endogenous H2S detection with large Stokes shift and its application in cell imaging
Source: Royal Society of Chemistry journal article supplement (doi:10.1039/d1nj01319j), 2021-01-01
Supplement: d1nj01319j1.pdf [file d1nj01319j1.pdf]

*Supporting Information for*

A novel fast-responsive fluorescent probe based on 1, 3,  
5-triazine for endogenous H<sub>2</sub>S detection with large  
Stokes shift and its application in cell imaging

*Zhi-Hao Zhang,<sup>a†</sup> Shaoqing Li,<sup>b†</sup> Yizhe Yan<sup>b\*</sup>, Jianbo Qu,<sup>a</sup> Jian-Yong Wang<sup>a\*</sup>*

<sup>a</sup> School of Light Industry and Engineering, Qi Lu University of Technology  
(Shandong Academy of Sciences), Jinan, 250353, P. R., China,

<sup>b</sup> College of Food and Bioengineering, Henan Key Laboratory of Cold Chain Food  
Quality and Safety Control, Zhengzhou University of Light Industry,  
Zhengzhou, 450000, P.R. China

† These authors contributed equally.

Email: [wjy@qlu.edu.cn](mailto:wjy@qlu.edu.cn)

---

\*Correspondence to: Jian-Yong Wang, School of Light Industry and Engineering, Qi Lu University of  
Technology(Shandong Academy of Sciences), Jinan, 250353, P. R., China, Email: [wjy@qlu.edu.cn](mailto:wjy@qlu.edu.cn)

## Table of contents

|                                                           |     |
|-----------------------------------------------------------|-----|
| Materials and apparatus.....                              | S4  |
| The verification of the proposed sensing mechanism.....   | S4  |
| Cell culture and Cytotoxicity assays.....                 | S4  |
| Imaging of exogenous H <sub>2</sub> S in HeLa cells.....  | S5  |
| Imaging of endogenous H <sub>2</sub> S in HeLa cells..... | S6  |
| Synthesis of the compound <b>3</b> .....                  | S6  |
| Synthesis of the compound <b>TzAr-OH</b> .....            | S7  |
| Synthesis of the probe <b>TzAr-H<sub>2</sub>S</b> .....   | S8  |
| Fig. S1.....                                              | S9  |
| Fig. S2.....                                              | S9  |
| Fig. S3.....                                              | S10 |
| Fig. S4.....                                              | S10 |
| Fig. S5.....                                              | S11 |
| Fig. S6.....                                              | S11 |
| Fig. S7.....                                              | S12 |
| Fig. S8.....                                              | S12 |
| Fig. S9.....                                              | S13 |
| Fig. S10.....                                             | S13 |
| Fig. S11.....                                             | S14 |
| Fig. S12.....                                             | S14 |
| Table S1.....                                             | S15 |

Table S2.....S16

## **Materials and apparatus**

Unless otherwise noted, all reagents and materials were purchased from commercial company and used without further purification. Twice-distilled water was applied to all experiments. High-resolution electrospray (ESI-HRMS) mass spectra were examined from Bruker APEX IV-FTMS 7.0T mass spectrometer; NMR spectra were obtained from AVANCE III 400 MHz Digital NMR Spectrometer with TMS as an internal standard; Electronic absorption spectra were recorded on a LabTech UV Power spectrometer; Photoluminescent spectra were obtained with a HITACHI F4700 fluorescence spectrophotometer; The fluorescence images were collected with Nikon A1MP confocal microscopy with a CCD camera; The pH measurements were implemented on a Mettler-Toledo Delta 320 pH meter; analysis was exhibited on silica gel plates and column chromatography was carried out over silica gel (mesh 200-300). Both TLC and silica gel were purchased from the Qingdao Ocean Chemicals.

## **The verification of the proposed sensing mechanism**

To confirm the proposed mechanism is correct, the probe **TzAr-H<sub>2</sub>S** (0.016 mmol, 9.7mg), excess NaHS (15.0mg) and 2.0 mL mixed solution of ethanol and PBS (1:1) were added into a 25mL reaction tube in sequence, and stirred at 37°C for 6 hours. After the reaction ended, the solution was extracted three times by dichloromethane. Then the organic phases were combined and dried over anhydrous sodium sulfate, filtered, and concentrated under reduced pressure. The product of the H<sub>2</sub>S nucleophilic reaction was obtained by Column chromatography.

## **Cell culture and cytotoxicity assays**

Hela cells were provided by Jiangsu Kaiji Biotechnology Co., Ltd. The living HeLa cells were cultured in the Dulbecco's modified Eagle's medium (DMEM) supplemented with fetal bovine serum (10% FBS) under the atmosphere containing 5%

CO<sub>2</sub> and 95% air at 37 °C. The cytotoxic effects of the probe **TzAr-H<sub>2</sub>S** were tested by the MTT assay. The living cells line were treated in DMEM (Dulbecco's Modified Eagle Medium) supplied with fetal bovine serum (10%, FBS), penicillin (100 U/mL) and streptomycin (100 µg/mL) under the atmosphere of CO<sub>2</sub> (5%) and air (95%) at 37 °C. The HeLa cells were then seeded into 96-well plates, and 0, 1, 2, 3, 5, 10, 20µM (final concentration) of the probe **TzAr-H<sub>2</sub>S** (99.9% DMEM and 0.1% DMSO) were added respectively. Subsequently, the cells were cultured at 37 °C in an atmosphere of CO<sub>2</sub> (5%) and air (95%) for 24 hours. Then the HeLa cells were washed with PBS buffer, and DMEM medium (500 µL) was added. Next, MTT (50 µL, 5 mg/mL) was injected to every well and incubated for 4 h. Violet formazan was treated with sodium dodecyl sulfate solution (500 µL) in the H<sub>2</sub>O-DMF mixture. Absorbance of the solution was measured at 570 nm by the way of a microplate reader. The cell viability was determined by assuming 100% cell viability for cells without **TzAr-H<sub>2</sub>S**.

### **Imaging of exogenous H<sub>2</sub>S in HeLa cells**

HeLa cells were grown in modified Eagle's medium (MEM) replenished with 10% FBS with the atmosphere of 5% CO<sub>2</sub> and 95% air at 37 °C for 24 h. For fluorescence imaging experiments, the cells were divided into two samples; one was incubated with the **TzAr-H<sub>2</sub>S** probe (10 µM) only as a control, the other group was HeLa cells treated with **TzAr-H<sub>2</sub>S** (10 µM) for 30 min, then with NaHS(100 µM) for 30 min at 37 °C. All HeLa cells were washed three times with PBS buffer after incubation. The experiments of cell imaging were acquired with a Nikon A1MP confocal microscopy

with the equipment of a CCD camera. Cell images were obtained using 350 nm excitation and signals were collected from 360 nm to 600 nm.

### Imaging of endogenous H<sub>2</sub>S in HeLa cells

Before the experiments, the well prepared cells were washed with PBS (pH = 7.4) buffer three times. HeLa cells were treated with 10  $\mu$ M **TzAr-H<sub>2</sub>S** for 20 min and then washed with PBS three times to remove the probe left in solution and optimize the back-ground signal, the cells incubated with 100  $\mu$ M cysteine for 2 h in an atmosphere of 5% CO<sub>2</sub> and 95% air. For the control experiments, the cells were treated with 10  $\mu$ M **TzAr-H<sub>2</sub>S** for 20 min and then washed with PBS three times, and then cultivated for 2 h under the same conditions. For negative control group, the HeLa cells incubated with probe **TzAr-H<sub>2</sub>S** (10  $\mu$ M) for 20 min at 37°C, washed by PBS buffer and subsequently incubated with 100  $\mu$ M cysteine and DL-propargylglycine (PAG, 200  $\mu$ M) for 2 h prior to imaging. Before imaging, cells were washed with PBS three times, and the fluorescence images were acquired through a Nikon A1MP confocal microscopy inverted fluorescence microscopy equipped with a cooled CCD camera.

### Synthesis of the compound 3

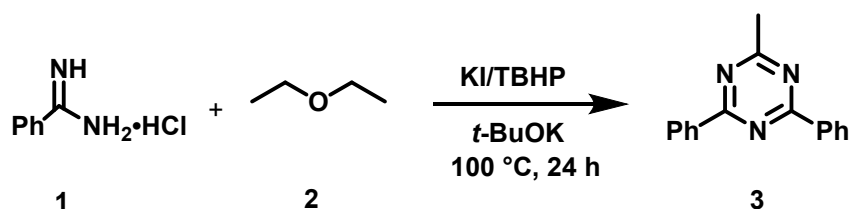

Compound **1** (2.0 mmol, 313.2mg), compound **2** (2.5 mL), potassium tert-butoxide (2.0 mmol, 224.4mg), potassium iodide (0.4mmol), and tert-butanol hydrogen peroxide (70%, 4.0 mmol, 515.0mg) were added into a 25mL reaction tube in sequence, and stirred at 100°C for 24 hours. Then the solution was cooled to room temperature and quenched with water, which were extracted three times by ethyl acetate. The organic phases were combined and dried over anhydrous sodium sulfate, filtered, and concentrated under reduced pressure. Compound **3** was obtained by Column chromatography (petroleum ether: ethyl acetate = 100 :1~80:1) (23%, white solid, 115.3mg).

#### Synthesis of the compound TzAr-OH

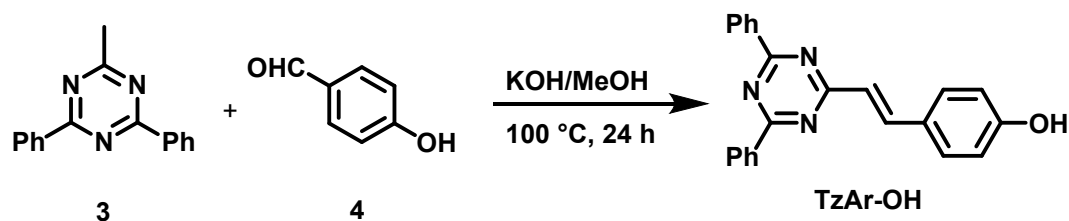

Compound **3** (0.20 mmol, 49.5mg), compound **4** (0.20 mmol, 24.4mg) and potassium hydroxide (1.0 mmol) were dissolved in methanol (1.0 mL) into a 10mL reaction tube in turn and stirred at 100°C for 24 hours. Then reaction solution was cooled to room temperature and quenched with water, which were extracted three times with ethyl acetate. The organic phases were combined and dried over anhydrous sodium sulfate, filtered, concentrated under reduced pressure, and purified by column chromatography (dichloromethane: ethyl acetate = 80:1) to obtain **TzAr-OH** of the product (yellow- 26.21 % yield, green solid, 11.2 mg). <sup>1</sup>H NMR (600 MHz, DMSO-*d*<sub>6</sub>): δ 10.08 (s, 1H), 8.67-8.65 (m, 4H), 8.37 (*J* = 15.8 Hz, 1H), 7.75-7.73 (m, 2H),

7.70-7.67 (m, 2H), 7.65-7.61 (m, 4H), 7.14 ( $J = 15.8$  Hz, 1H), 6.89-6.86 (m, 2H);  $^{13}\text{C}$  NMR (150 MHz,  $\text{DMSO-}d_6$ ):  $\delta$  172.1, 170.5, 159.9, 142.6, 135.6, 132.9, 130.6, 129.0, 128.6, 126.2, 122.4, 116.0; HRMS (ESI): calcd for  $\text{C}_{23}\text{H}_{18}\text{N}_3\text{O}$   $[\text{M}+\text{H}]^+$  352.1444, found 352.1451.

### Synthesis of the probe **TzAr-H<sub>2</sub>S**

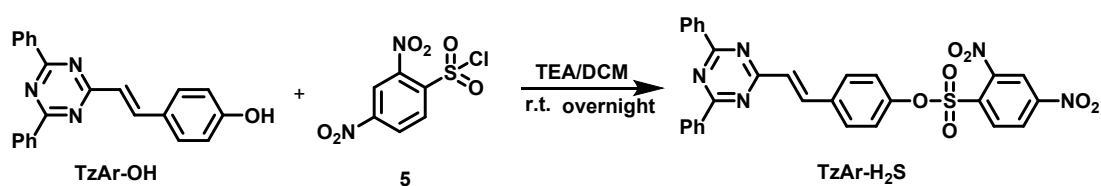

The compound **TzAr-OH** (0.20 mmol, 70.3mg) and 2,4-dinitrobenzenesulfonyl chloride (0.20 mmol, 53.3mg) were dissolved in dichloromethane (5.0 mL). After that triethylamine (0.20 mmol, 20.238mg) was added slowly at 0 °C. The reaction was moved to room temperature overnight. The crude product was purified by silica gel column chromatography to obtain the probe **TzAr-H<sub>2</sub>S**.  $^1\text{H}$  NMR (400 MHz,  $\text{CDCl}_3$ )  $\delta$  8.70 (d, 5H), 8.52 (d, 1H), 8.35 (d, 1H), 8.24 (d, 1H), 7.73 (d, 2H), 7.60 (td, 6H), 7.30 (d, 3H);  $^{13}\text{C}$  NMR (100 MHz,  $\text{CDCl}_3$ ):  $\delta$  171.5, 171.2, 151.0, 149.4, 149.1, 139.6, 135.8, 135.7, 133.9, 133.6, 132.8, 129.9, 129.0, 128.7, 128.2, 126.4, 122.6, 120.4; HRMS (ESI): calcd for  $\text{C}_{29}\text{H}_{20}\text{N}_5\text{O}_7\text{S}$   $[\text{M}+\text{H}]^+$  582.1078, found 582.1072.



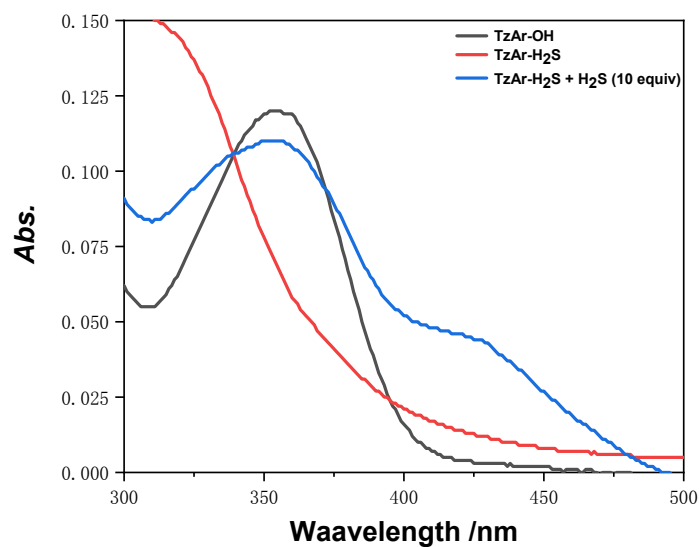

**Fig. S1.** The absorption spectra of **TzAr-OH** (10  $\mu$ M) and **TzAr-H<sub>2</sub>S** (10  $\mu$ M) in pH 7.4 PBS/EtOH (v/v = 1/1) in the absence or presence of NaHS (10.0 equiv).

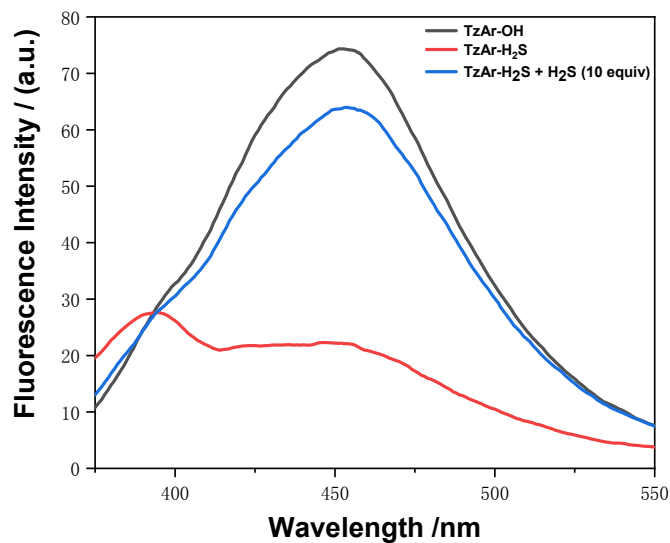

**Fig. S2.** The fluorescence spectra of **TzAr-OH** (10  $\mu$ M) and **TzAr-H<sub>2</sub>S** (10  $\mu$ M) in pH 7.4 PBS/EtOH (v/v = 1/1) in the absence or presence of NaHS (10.0 equiv).

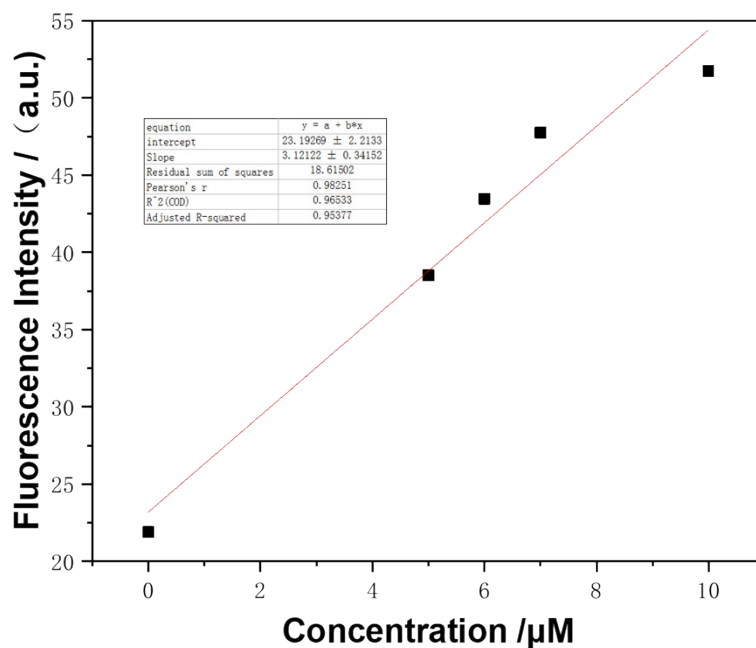

**Fig. S3.** The linear fit of **TzAr-H<sub>2</sub>S** (10  $\mu$ M) in pH 7.4 PBS/EtOH (v/v = 1/1) in the absence or presence of NaHS (0-1 equiv).

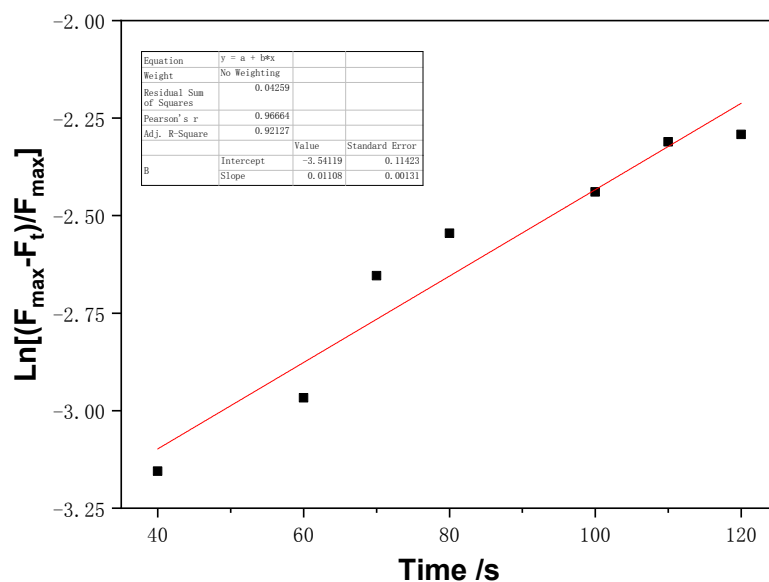

**Fig. S4.** Pseudo-first-order kinetic plot of the reaction of **TzAr-H<sub>2</sub>S** in the presence of NaHS (10.0 equiv) at room temperature.

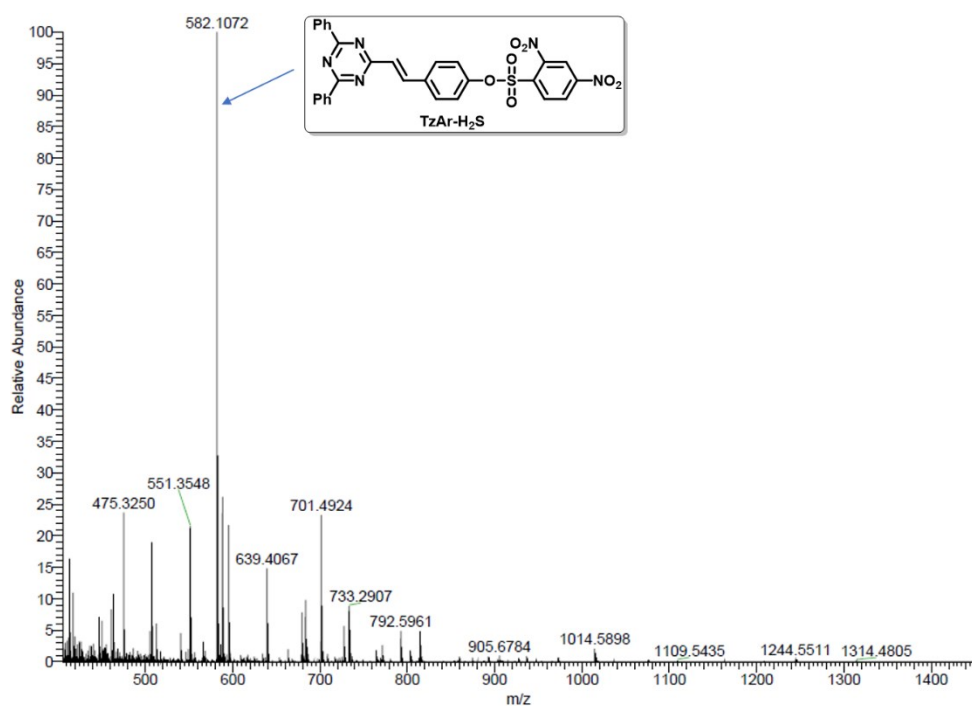

**Fig. S5.** HRMS (positive ion mode) spectrum of **TzAr-H<sub>2</sub>S**.

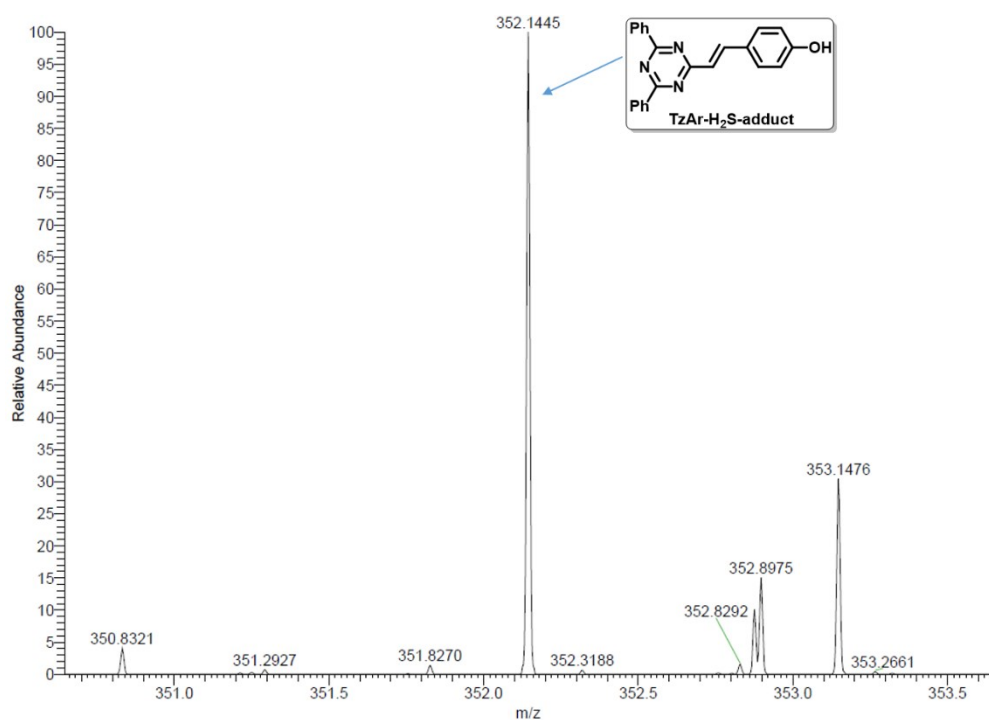

**Fig. S6.** HRMS (positive ion mode) spectrum of **TzAr-H<sub>2</sub>S** (10  $\mu$ M) after treatment with NaHS (100  $\mu$ M) in pH 7.4 PBS/EtOH (v/v = 1/1) for 20 min. The peak at m/z 352.1445 corresponds to **TzAr-OH**.

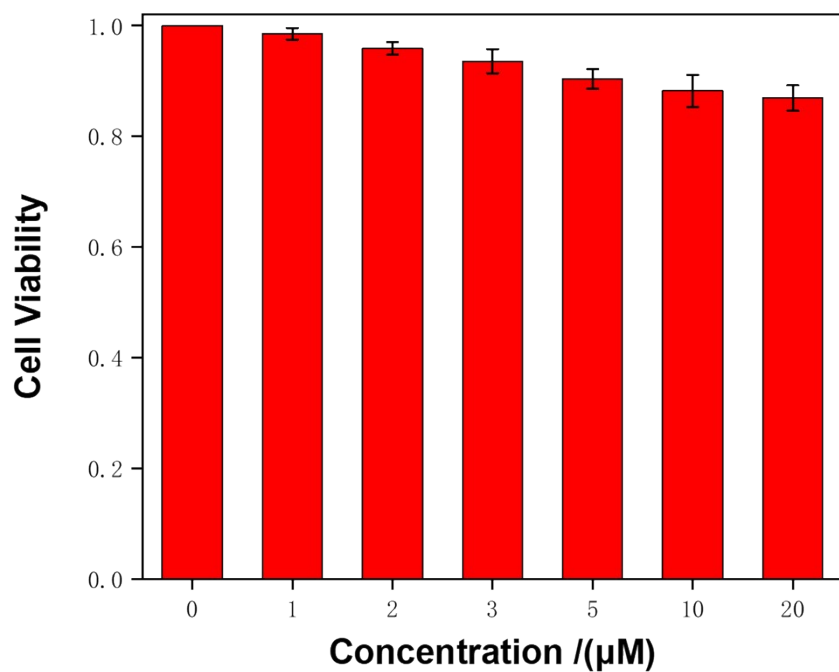

**Fig. S7.** Cytotoxicity assays of **TzAr-H<sub>2</sub>S** at different concentrations (0 μM; 1 μM; 2 μM; 3 μM; 5 μM; 10 μM; 20 μM) for HeLa cells

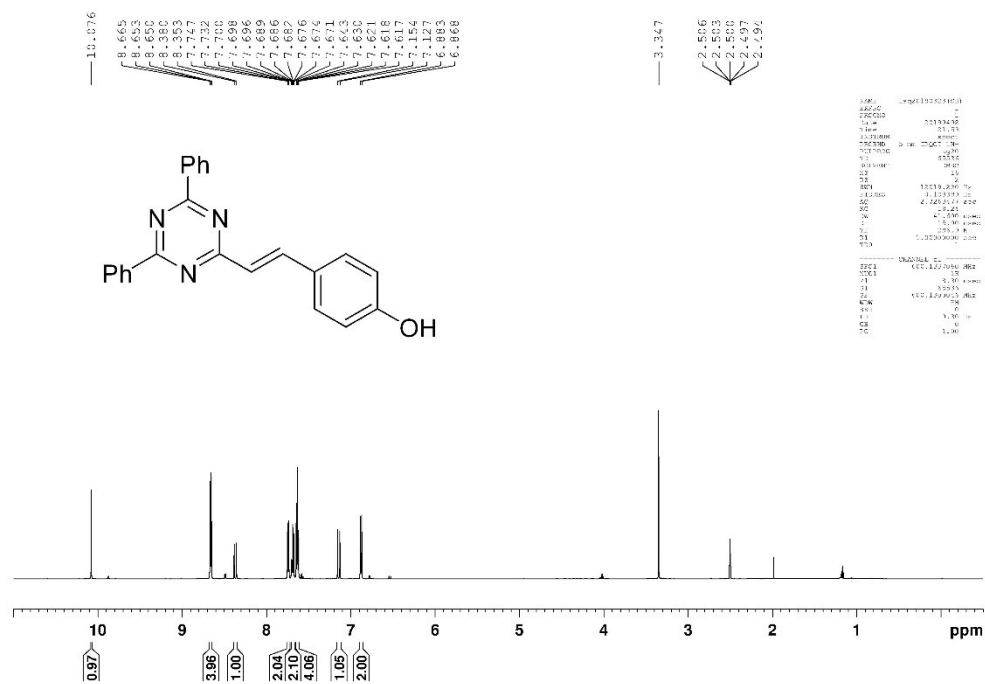

**Fig. S8.** <sup>1</sup>H NMR (DMSO-*d*<sub>6</sub>) spectrum of **TzAr-OH**.

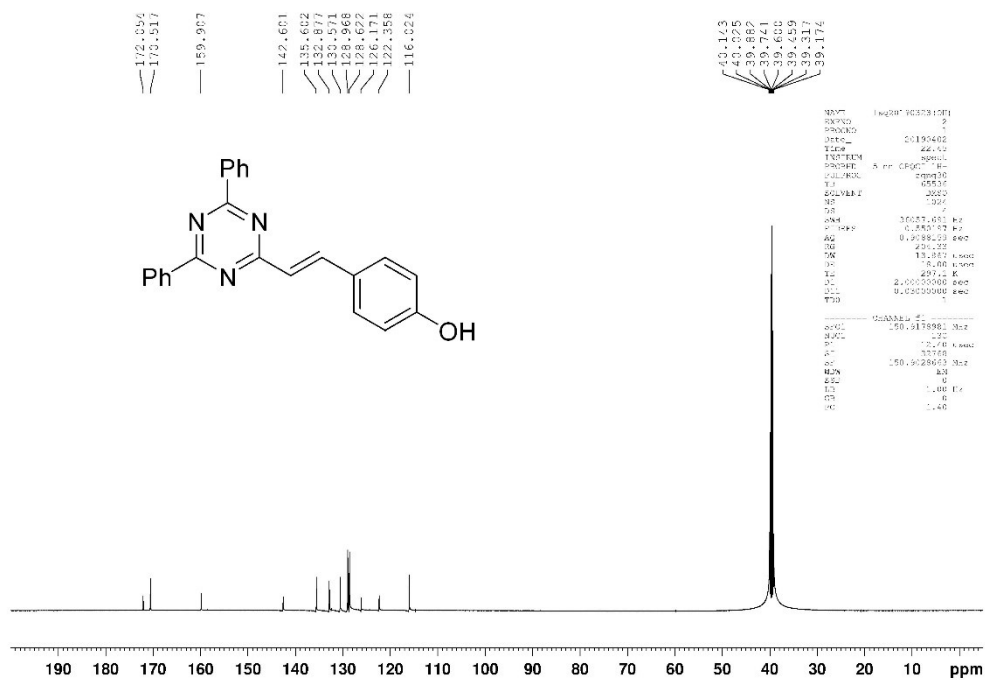

Fig. S9. <sup>13</sup>C-NMR (DMSO-*d*<sub>6</sub>) spectrum of TzAr-OH.

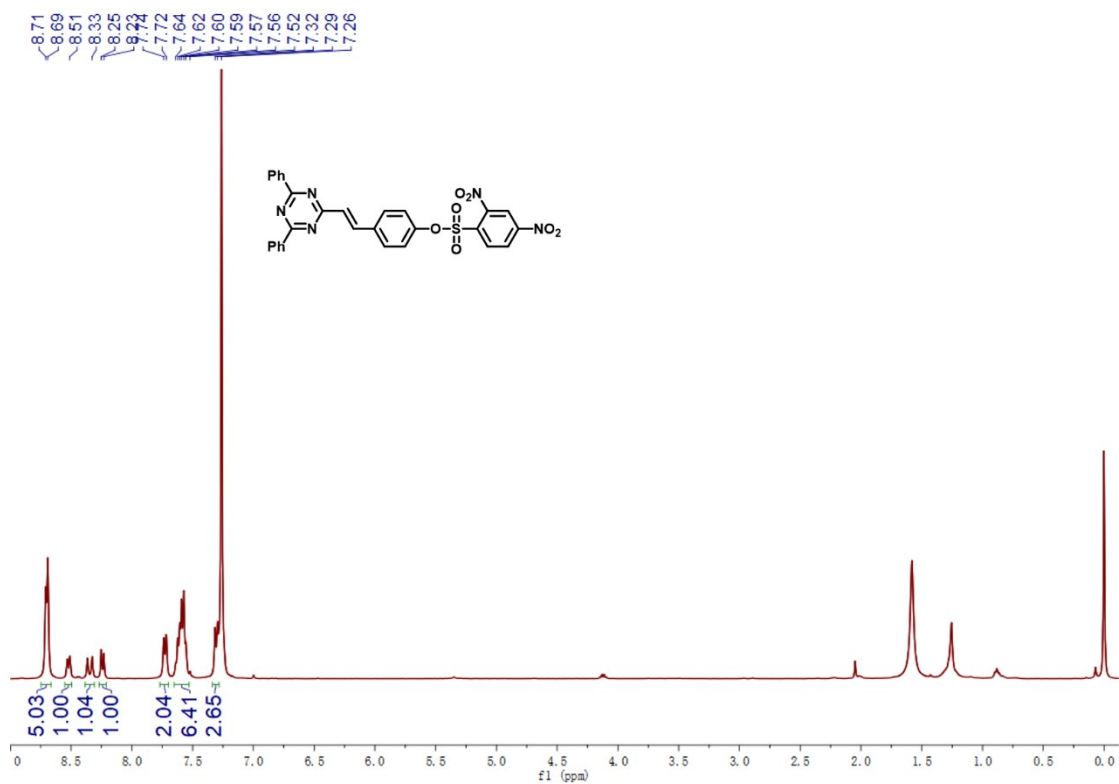

Fig. S10. <sup>1</sup>H-NMR (CDCl<sub>3</sub>) spectrum of TzAr-H<sub>2</sub>S.

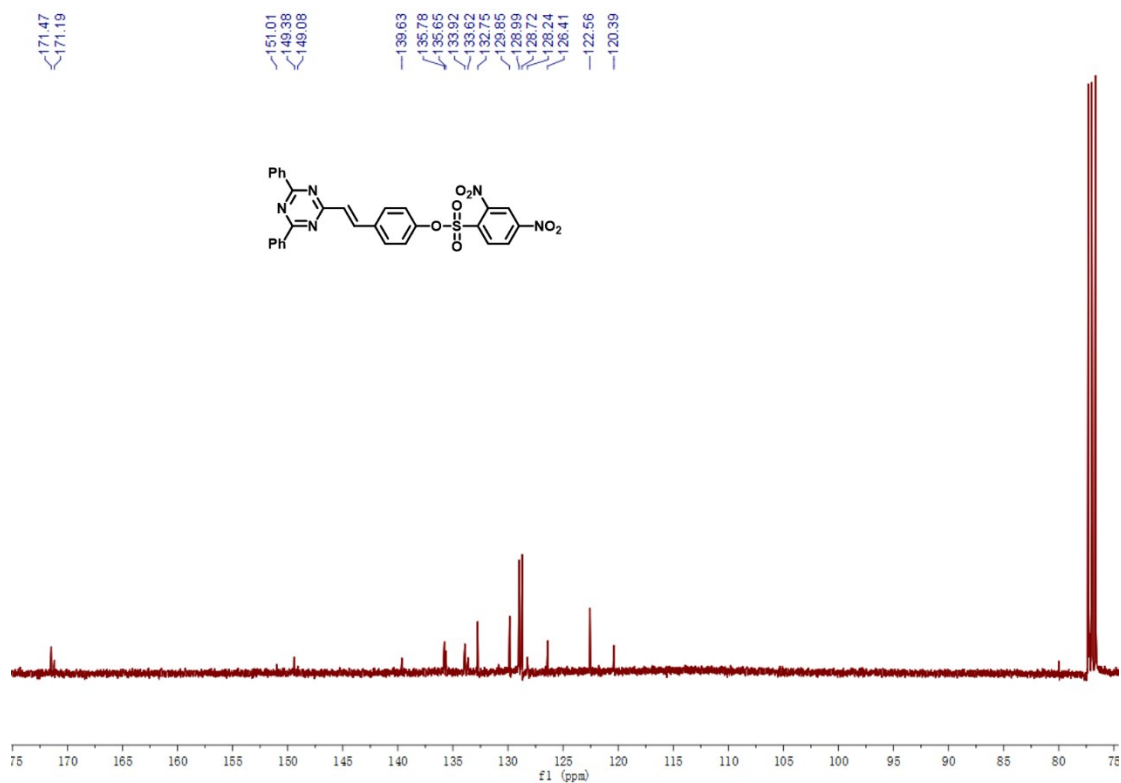

**Fig. S11.** <sup>13</sup>C-NMR (CDCl<sub>3</sub>) spectrum of TzAr-H<sub>2</sub>S.

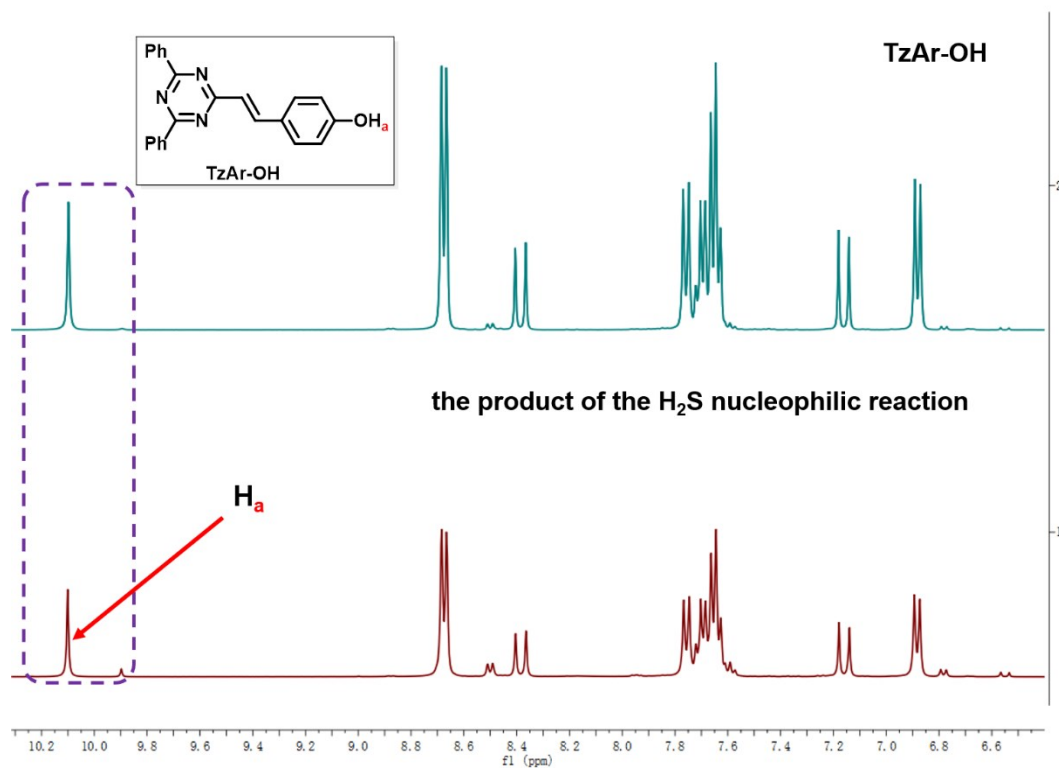

**Fig. S12.** <sup>1</sup>H NMR (DMSO-*d*<sub>6</sub>) spectrum of the products of the H<sub>2</sub>S nucleophilic reaction and TzAr-OH.

Table S1 Comparison of the reported fluorescent probes for the detection of H<sub>2</sub>S

| Probes                                                                              | Response time | Detection limitation   | Stokes shift | Imaging                      | References                                                  |
|-------------------------------------------------------------------------------------|---------------|------------------------|--------------|------------------------------|-------------------------------------------------------------|
| 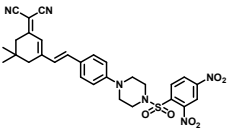   | 60 s          | 6 nM                   | 221 nm       | Living cells<br>mice         | <i>Sens. Actuat. B.-Chem.</i> , 2018, <b>262</b> , 837-844. |
|    | 30 s          | 27.3 nM                | 130 nm       | Living cells                 | <i>Spectrochim. Acta. A.</i> , 2020, <b>243</b> , 118775.   |
|    | 0.73 min      | 0.17 μM                | 160 nm       | Living cells                 | <i>Dyes Pigments.</i> , 2019, <b>165</b> , 31-37.           |
|  | 3 min         | 0.206 μM               | 135 nm       | -                            | <i>Tetrahedron.</i> , 2021, <b>81</b> , 131923.             |
|  | 150 s         | 9.1×10 <sup>-8</sup> M | 109 nm       | Living cells<br>Living cells | <i>Chem. Commun.</i> , 2015, <b>51</b> , 1510-1513.         |
|  | 120 s         | 1.08 nM                | 70 nm        | Living cells<br>mice         | <i>Sens. Actuat. B.-Chem.</i> , 2019, <b>288</b> , 507-511. |
|  | 3500 s        | 0.48 μM                | 68 nm        | Living cells                 | <i>Sens. Actuat. B.-Chem.</i> , 2019, <b>298</b> , 126875.  |
|  | 20 min        | 0.48 μM                | 105 nm       | Living cells                 | <i>Org. Lett.</i> , 2013, <b>15</b> , 2310-2313.            |
|  | 20 s          | 2.13 μM                | 100 nm       | Living cells                 | This work                                                   |

Table S2 Optical properties and quantum yields of the **TzAr** dyes in different solvents

| dyes                       | solvents           | $\lambda_{\text{Abs, max}}$ | $\lambda_{\text{Em, max}}$ | Stokes shift | $\phi$ |
|----------------------------|--------------------|-----------------------------|----------------------------|--------------|--------|
| <b>TzAr-H<sub>2</sub>S</b> |                    | 317/0.228                   | 451/6.520                  | 134          | 0.017  |
| <b>TzAr-OH</b>             | DMSO               | 361/0.156                   | 463/14.150                 | 102          | 0.053  |
| <b>TzAr-H<sub>2</sub>S</b> |                    | 317/0.213                   | 451/7.988                  | 134          | 0.010  |
| <b>TzAr-OH</b>             | THF                | 355/0.148                   | 432/28.840                 | 77           | 0.050  |
| <b>TzAr-H<sub>2</sub>S</b> |                    | 318/0.199                   | 449/6.590                  | 131          | 0.012  |
| <b>TzAr-OH</b>             | CH <sub>3</sub> CN | 346/0.156                   | 453/19.230                 | 107          | 0.044  |
| <b>TzAr-H<sub>2</sub>S</b> |                    | 319/0.218                   | 438/5.495                  | 119          | 0.013  |
| <b>TzAr-OH</b>             | EtOH               | 354/0.166                   | 389/3.079                  | 35           | 0.010  |
| <b>TzAr-H<sub>2</sub>S</b> |                    | 327/0.175                   | 457/4.117                  | 130          | 0.016  |
| <b>TzAr-OH</b>             | MeOH               | 353/0.150                   | 458/11.720                 | 105          | 0.054  |
| <b>TzAr-H<sub>2</sub>S</b> |                    | 318/0.184                   | 448/6.773                  | 130          | 0.017  |
| <b>TzAr-OH</b>             | DMF                | 359/0.147                   | 457/15.350                 | 98           | 0.049  |
| <b>TzAr-H<sub>2</sub>S</b> |                    | 317/0.238                   | 447/2.120                  | 130          | 0.011  |
| <b>TzAr-OH</b>             | EtOH:PBS=1:1       | 355/0.163                   | 447/5.200                  | 92           | 0.040  |
